# Supplementary figures and images for: A paucity of heterochromatin at functional human neocentromeres
Source: Springer Nature journal article supplement (doi:10.1186/1756-8935-3-6), 2010-03-08

# Supplementary Figure 1, Alonso et al.

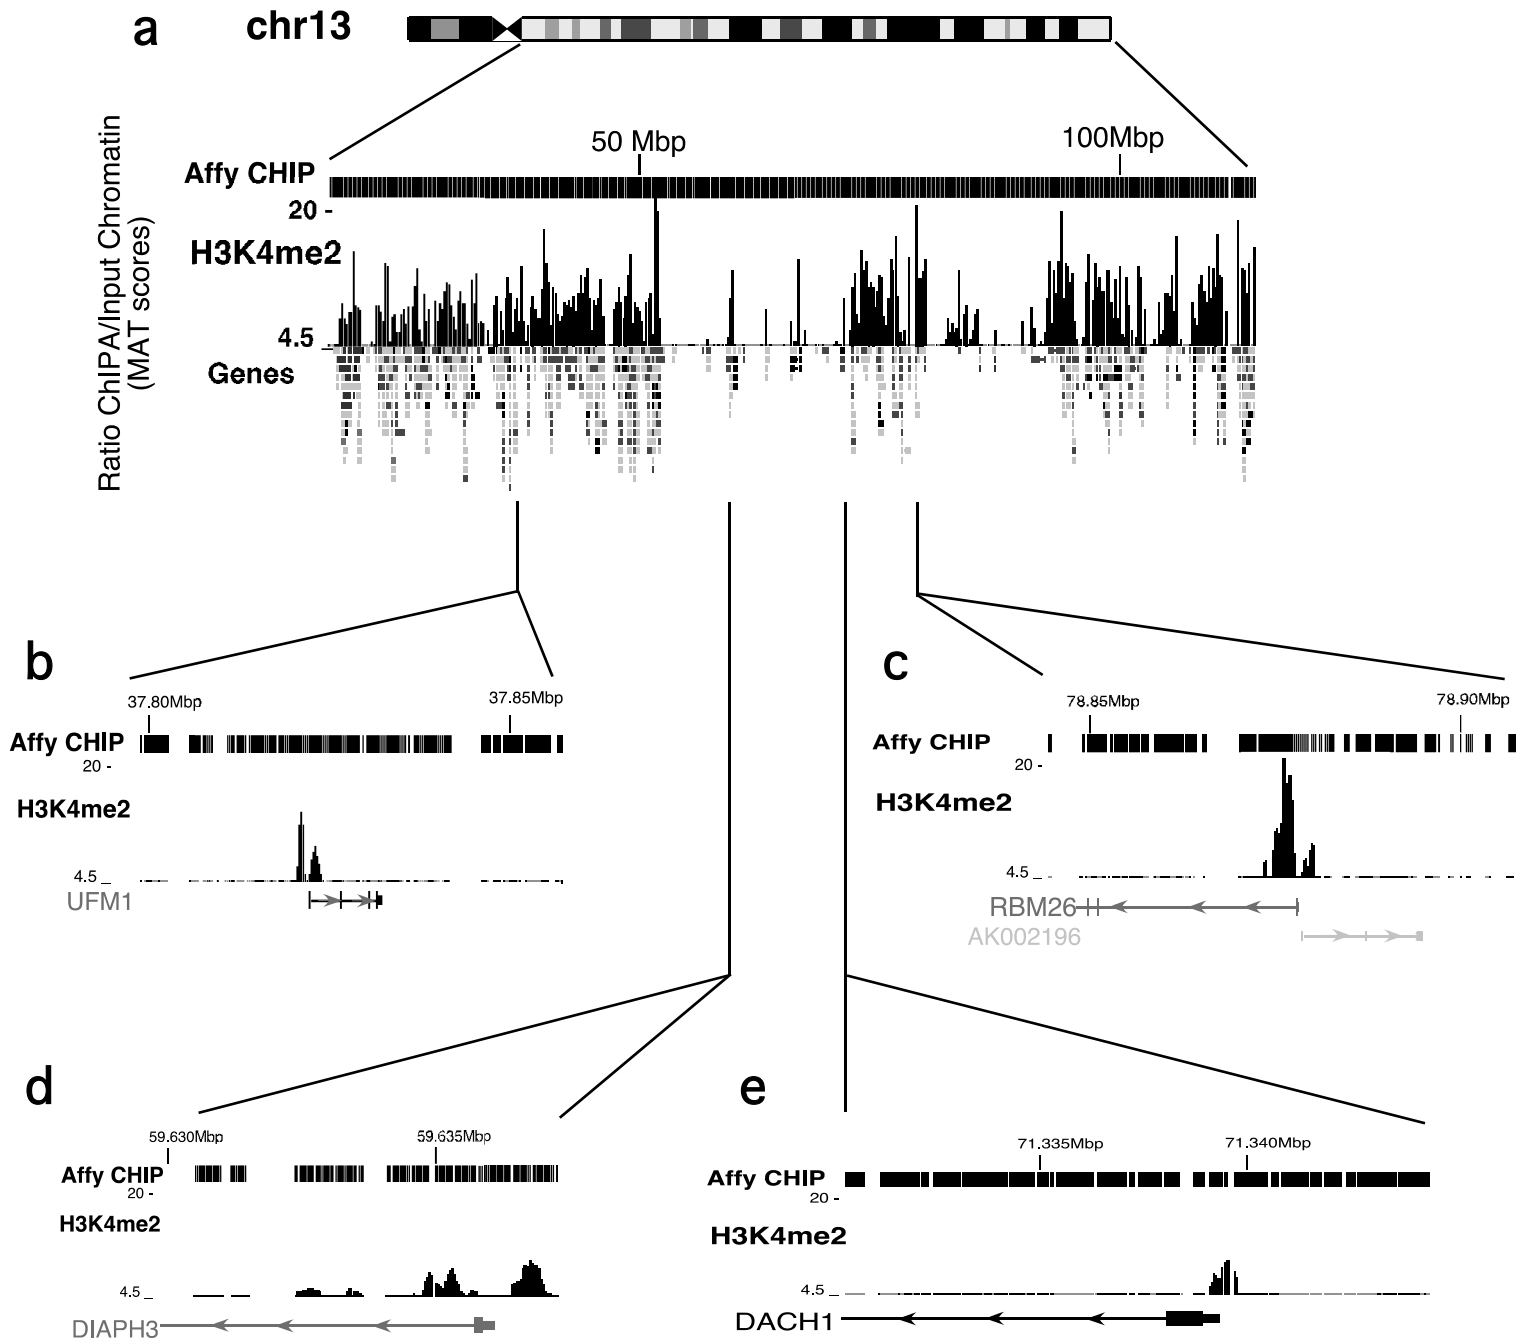

Supplement: Additional file 1 [file 1756-8935-3-6-s1.pdf]
